---

# Erratum

Larger E, Rakotoambinina B, Eddouks M, Timsit J, Boitard C, Assan R, Burcelin R, Robert J-J: Normal insulin sensitivity during the late preclinical stage of type 1 diabetes (Letter). *Diabetes Care* 27:1842–1843, 2004

In the above-listed article, the second author's surname was misspelled. The correct citation appears above.
